# Supplementary material for: Spliceosome gene mutations synergize with anthracyclines to amplify atrial fibrillation risk in hematologic malignancies: a multicenter cohort study with discovery and validation
Source: Research Square preprint supplement (doi:10.21203/rs.3.rs-8596634/v1), 2026-01-19

**Supplementary methods**

**Next generation sequencing**

After collection of bone marrow or peripheral blood of the patients into tubes containing ethylene diamine tetraacetic acid (EDTA) as anticoagulant and isolation of mononuclear cells, 1 μg of DNA was extracted for construction of a whole genomic DNA library. The target genome (325 hematological tumor-related genes, Supplementary Table S4) was amplified using PCR primers, the target region DNA was enriched, and sequencing was performed using the Ion Torrent sequencing platform, with an average gene coverage rate of 98.1% and an average sequencing depth of 1314 × and more than 20 × for 95% of the target region DNA.

The NGS bioinformatics pipeline comprised: Raw data quality control by FastQC followed by adapter and low-quality base trimming using Trimmomatic; Alignment to the GRCh37.p13 reference genome using BWA-MEM; PCR duplicate marking with Picard; Germline variant detection by GATK HaplotypeCaller and somatic variant detection by Mutect2; Variant annotation for population frequency with dbSNP v155, cancer mutations using COSMIC v96, and clinical pathogenicity via ClinVar 2024 release; Germline variants filtered by GATK VQSR, somatic variants filtered at depth ≥1314× and VAF ≥2%; Functional impact prediction through ANNOVAR or SnpEff; Final reporting prioritized ClinVar pathogenic/likely pathogenic variants, COSMIC driver mutations, and ACMG-classified variants.

**Detection of cytokine levels**

Peripheral blood (PB) samples were collected at the time of the first visit to the Department of Hematology, the Second Hospital of Tianjin Medical University, and tested within 2 hours. Several inflammatory biomarkers, including interleukin (IL) ‑ 1β, IL ‑ 2, IL ‑ 4, IL ‑ 5, IL ‑ 6, IL ‑ 8, IL ‑ 10, IL ‑ 12, IL ‑ 17A, IL ‑ 17F, IL ‑ 22, tumor necrosis factor (TNF) ‑ α, TNF ‑ β, and interferon (IFN) ‑ γ, were captured by microspheres of known volume and fluorescence intensity using liquid chip multifactor flow detection technology. The corresponding fluorescence was detected by flow cytometry, and the content of corresponding cytokines of the sample to be tested was obtained based on the fluorescence intensity. All flow cytometry analyses were performed using a Beckman CytoFLEX LX flow cytometer.

**Monocyte isolation**

Fresh human peripheral blood was collected, and human peripheral blood mononuclear cells (PBMCs) were isolated and extracted. The PBMCs were resuspended in phosphate-buffered saline (PBS) containing 2% fetal bovine serum (FBS), and the cell concentration was adjusted to 1×10⁶-5×10⁶ cells/mL. Subsequently, anti-human CD45-FITC and anti-human CD14-PE antibodies were added, followed by incubation at 4°C for 20 minutes in the dark. After incubation, the cells were washed with PBS. A flow cytometer (BD FACSAria) was used to sort CD45⁺ leukocytes, and finally, CD45⁺CD14⁺ cells (i.e., monocytes) were isolated for subsequent co-culture experiments.

**Cell Co-Culture Model**

A cell co-culture model was established using Trans-well chambers (Corning Inc., New York, USA). Monocytes in 6-well plates were placed in the lower chamber, while human atrial fibroblasts were seeded in the upper chamber. After 24 hours of co-culture, the fibroblasts were collected for subsequent experiments.

**Western blot analysis**

Fibroblasts in the co-culture system were collected, and RIPA lysis buffer containing protease and phosphatase inhibitors was added to the cells on ice for protein extraction. Protein samples were separated in a 12.5% polyacrylamide gel for 1 hour, then transferred to a polyvinylidene fluoride (PVDF) membrane overnight at 4°C. At room temperature, the membrane was blocked with Tris-buffered saline (TBS) containing 5% bovine serum albumin (BSA) for 1 hour. Primary antibody was added, and the membrane was incubated overnight at 4°C. After incubation, the membrane was washed 3 times with TBS containing Tween (TBST), 10 minutes each time. Subsequently, the corresponding fluorescently labeled secondary antibody (anti-mouse or anti-rabbit secondary antibody selected according to the species of the primary antibody) was added, and the membrane was incubated at 4°C for 2-3 hours. Finally, the membrane was washed again 3 times with TBST, 10 minutes each time.β-actin were used as internal references. Images were acquired, and densitometric analysis was performed using Image J software.

Supplementary Table S1. Baseline characteristics of hematologic malignancy patients stratified by AF status

|  | AF (n=164) | non-AF (n=1569) | *P*-value |
| --- | --- | --- | --- |
| Follow-up time, y media (range) | 3 (1-21) | 4 (1-29) | 0.091 |
| Age, media (range) | 70 (15-88) | 61 (3-92) | <0.001*** |
| Age, years |  |  | <0.001*** |
| ≤40 | 4 (2.4%) | 255(16.3%) |  |
| 41-50 | 6 (3.7%) | 182 (11.6%) |  |
| 51-60 | 23 (14.0%) | 346 (22.1%) |  |
| 61-70 | 53 (32.3%) | 478 (30.5%) |  |
| ＞70 | 78 (47.6%) | 308 (19.6%) |  |
| Male, n (%) | 100 (61.0%) | 834 (53.2%) | 0.059 |
| Diagnosis |  |  |  |
| Ph-MPN (n=440), n (%) | 69 (42.1%) | 467 (29.8%) |  |
| CML (n=38), n (%) | 2 (1.2%) | 48 (3.1%) |  |
| AML (n=173), n (%) | 18 (11.0%) | 279 (17.8%) |  |
| MDS (n=168), n (%) | 28 (17.1%) | 373 (23.8%) |  |
| MDS/MPN (n=27), n (%) | 5 (3.0%) | 37 (2.4%) |  |
| Lymphoid Malignancy (n=328), n (%) | 42 (25.6%) | 365 (23.3%) |  |
| At the time of diagnosis |  |  |  |
| HB, g/L media (range) | 108.5 (28-214) | 105 (21-261) | 0.878 |
| WBC, ×109/L media (range) | 7.55 (0.01-181) | 6.70 (0.01-498.7) | 0.276 |
| Monocytes, ×109/L media (range) | 0.47 (0.01-6.87) | 0.35 (0.01-75.8) | 0.072 |
| PLT, ×109/L media (range) | 247 (6-1670) | 175.5 (1-2433) | 0.044* |
| Anthracycline drug exposure, n (%) | 30 (18.3%) | 220 (14%) | 0.160 |
| Hypertension, n (%) | 68 (41.5%) | 493(31.4%) | 0.011* |
| Hyperlipidemia, n (%) | 8 (4.9%) | 96 (6.1%) | 0.608 |
| Diabetes, n (%) | 35 (21.3%) | 230 (14.7%) | 0.030* |
| Smoking | 44 (26.8%) | 273 (17.4%) | 0.004** |
| Death, n (%) | 72 (43.9%) | 267 (17.0%) | <0.001*** |

Ph- MPN, philadelphia negative myeloproliferative neoplasm; CML, chronic myeloid leukemia; AML, acute myeloid leukemia; MDS, myelodysplastic syndrome; HB, hemoglobin; WBC, white blood cell; PLT, platelet count; AF, atrial fibrillation. * *P* < 0.05; ** *P* < 0.01; *** *P* < 0.001.

Supplementary Table S2. Baseline characteristics stratified by spliceosome gene mutation status after PSM

|  | PSM 1 (gender, age, hypertension, smoking, diabetes and hyperlipidemia) | | | PSM 2 (gender, age, hypertension, smoking, diabetes, hyperlipidemia, and exposure to anthracycline drugs) | | | |
| --- | --- | --- | --- | --- | --- | --- | --- |
|  | Spliceosome (n=147) | no-spliceosome (n=147) | *P*-value | Spliceosome (n=142) | no-spliceosome (n=142) | *P*-value |
| Age, media (range) | 68 (20-91) | 69 (15-89) | 0.919 | 68 (20-91) | 68 (15-89) | 0.705 |
| Male, n (%) | 96 (65.3%) | 100 (68.0%) | 0.711 | 92 (64.8%) | 95 (66.9%) | 0.802 |
| Anthracycline drug exposure, n (%) | 21 (14.3%) | 19 (12.9%) | 0.865 | 21 (14.8%) | 16 (11.3%) | 0.481 |
| Hypertension, n (%) | 58 (39.5%) | 58 (39.5%) | 1.000 | 57 (40.1%) | 56 (39.4%) | 1.000 |
| Hyperlipidemia, n (%) | 1 (0.7%) | 2 (1.4%) | 1.000 | 1 (0.7%) | 1 (0.7%) | 1.000 |
| Diabetes, n (%) | 30 (20.4%) | 22 (15.0%) | 0.285 | 28 (19.7%) | 20 (14.1%) | 0.268 |
| Smoking | 40 (27.2%) | 46 (31.3%) | 0.522 | 40 (28.2%) | 49 (34.5%) | 0.306 |
| ACS, n (%) | 22 (15.0%) | 24 (16.3%) | 0.873 | 22 (15.5%) | 20 (14.1%) | 0.867 |

PSM1, Propensity Score Matching; ACS, acute coronary syndrome.

Supplementary Table S3. Causal mediation analysis of LAD in spliceosome gene-associated AF risk

| Effect Type | Group | Estimate | 95% CI (Lower ~ Upper) | *P*-value |
| --- | --- | --- | --- | --- |
| ACME  (Average Causal Mediation Effect) | No-spliceosome gene mutation | 0.011 | 0.002 ~ 0.020 | 0.006** |
| spliceosome gene mutation | 0.013 | 0.003 ~ 0.030 | 0.006** |
| Average | 0.012 | 0.003 ~ 0.020 | 0.006** |
| ADE  (Average Direct Effect) | No-spliceosome gene mutation | 0.036 | -0.023 ~ 0.100 | 0.214 |
| spliceosome gene mutation | 0.038 | -0.024 ~ 0.110 | 0.214 |
| Average | 0.037 | -0.023 ~ 0.100 | 0.214 |
| Total Effect | - | 0.049 | -0.012~ 0.120 | 0.106 |
| Proportion Mediated | No-spliceosome gene mutation | 0.219 | -0.868~ 1.890 | 0.112 |
| spliceosome gene mutation | 0.266 | -0.747 ~ 1.800 | 0.112 |
| Average | 0.242 | -0.807 ~ 1.850 | 0.112 |

AF, atrial fibrillation. **P*<0.05, ** *P*<0.01.

Supplementary Table S4. List of 325 Genes Included in the Next-Generation Sequencing Panel

| ABCB1 | ABL1 | AKT1 | AKT3 | ALK | AMER1 | ANKRD26 | APC | ARAF | ARC |
| --- | --- | --- | --- | --- | --- | --- | --- | --- | --- |
| ARID1A | ARID1B | ARID2 | ASXL1 | ASXL2 | ATG2B | ATM | ATRX | B2M | BCL2 |
| BCL6 | BCOR | BCORL1 | BCR | BIRC3 | BLM | BLNK | BRAF | BRCA1 | BRCA2 |
| BRCC3 | BRINP3 | BTG1 | BTG2 | BTK | CACNA1E | CALR | CARD11 | CASP8 | CBFB |
| CBL | CBLB | CBLC | CCND1 | CCND2 | CCND3 | CCR4 | CD274 | CD28 | CD58 |
| CD79A | CD79B | CDC25C | CDKN1A | CDKN1B | CDKN2A | CDKN2B | CDKN2C | CEBPA | CHD8 |
| CIITA | CNOT3 | COL12A1 | CRBN | CREBBP | CRLF2 | CROCC | CSF1R | CSF3R | CSMD1 |
| CSNK1A1 | CTCF | CTLA4 | CUL4B | CUX1 | CXCR4 | CXCR5 | CYLD | DDR2 | DDX11 |
| DDX3X | DDX41 | DHX15 | DIS3 | DKC1 | DNAH9 | DNM2 | DNMT3A | DNMT3B | DOT1L |
| DPYD | DUSP22 | EBF1 | ECT2L | EED | EGFR | EGR1 | EGR2 | EIF2A | ELANE |
| EP300 | EPCAM | EPHA7 | EPOR | EPPK1 | ERBB2 | ERBB3 | ERBB4 | ERG | ETNK1 |
| ETV6 | EZH2 | FAM46C | FAS | FAT1 | FBXW7 | FGFR1 | FGFR2 | FGFR3 | FLT3 |
| FOXO1 | FOXO3 | GATA1 | GATA2 | GATA3 | GFI1 | GNA13 | GNAS | GSKIP | GSTM1 |
| GSTP1 | HAX1 | HRAS | ID3 | IDH1 | IDH2 | IFNLR1 | IGLL5 | IKZF1 | IKZF3 |
| IL7R | INPP5D | IRF4 | IRF8 | ITK | JAK1 | JAK2 | JAK3 | KDM5A | KDM6A |
| KIT | KLF2 | KLHL6 | KMT2A | KMT2B | KMT2C | KMT2D | KRAS | LMO2 | LTB |
| LYN | LYST | MAF | MAFA | MAFB | MALT1 | MAP2K1 | MAP2K4 | MAPK1 | MAX |
| MDM2 | MECOM | MED12 | MEF2B | MET | MIR142 | MLH1 | MPL | MS4A1 | MSH2 |
| MSH6 | MTHFR | MTOR | MTRR | MUC16 | MUM1 | MYBBP1A | MYC | MYD88 | MYH11 |
| MYOM2 | NARS | NCOR1 | NCOR2 | NF1 | NF2 | NFKB1 | NFKB2 | NFKBIE | NOTCH1 |
| NOTCH2 | NPM1 | NQO1 | NRAS | NT5C2 | NTRK1 | NTRK2 | NTRK3 | NUDT15 | P2RY8 |
| PAX5 | PBRM1 | PBX1 | PCLO | PDCD1LG2 | PDGFRA | PDGFRB | PHF6 | PIGA | PIK3CA |
| PIM1 | PLCG1 | PLCG2 | PML | PMS2 | POT1 | PPM1D | PRDM1 | PRKCB | PRPF40B |
| PRPF8 | PRPS1 | PTEN | PTK2B | PTPN1 | PTPN11 | PTPRD | PTPRT | RAD21 | RAF1 |
| RARA | RB1 | RBBP6 | REL | RELN | RET | RHOA | ROBO1 | ROBO2 | ROS1 |
| RPL10 | RPS15 | RPS6KB1 | RUNX1 | SAMD9 | SAMD9L | SAMHD1 | SETBP1 | SETD2 | SF1 |
| SF3A1 | SF3B1 | SGK1 | SH2B3 | SLCO1B1 | SMAD4 | SMARCA2 | SMARCA4 | SMARCB1 | SMC1A |
| SMC1B | SMC2 | SMC3 | SMN1 | SMO | SOCS1 | SOD2 | SOS1 | SPEN | SRP72 |
| SRSF2 | STAG2 | STAT1 | STAT2 | STAT3 | STAT4 | STAT5A | STAT5B | STAT6 | SUFU |
| SUZ12 | SYK | TAL1 | TBL1XR1 | TCF3 | TERC | TERT | TET1 | TET2 | TNFAIP3 |
| TNFRSF14 | TP53 | TP63 | TP73 | TPMT | TRAF2 | TRAF3 | TSC1 | TTN | TYK2 |
| U2AF1 | U2AF2 | UNC13D | USP7 | VEGFA | VPREB1 | WAC | WHSC1 | WT1 | XPO1 |
| ZAP70 | ZBTB7A | ZMYM3 | ZNF292 | ZRSR2 |  |  |  |  |  |

Figure S1. Incidence of AF and CHIP in hematologic malignancies


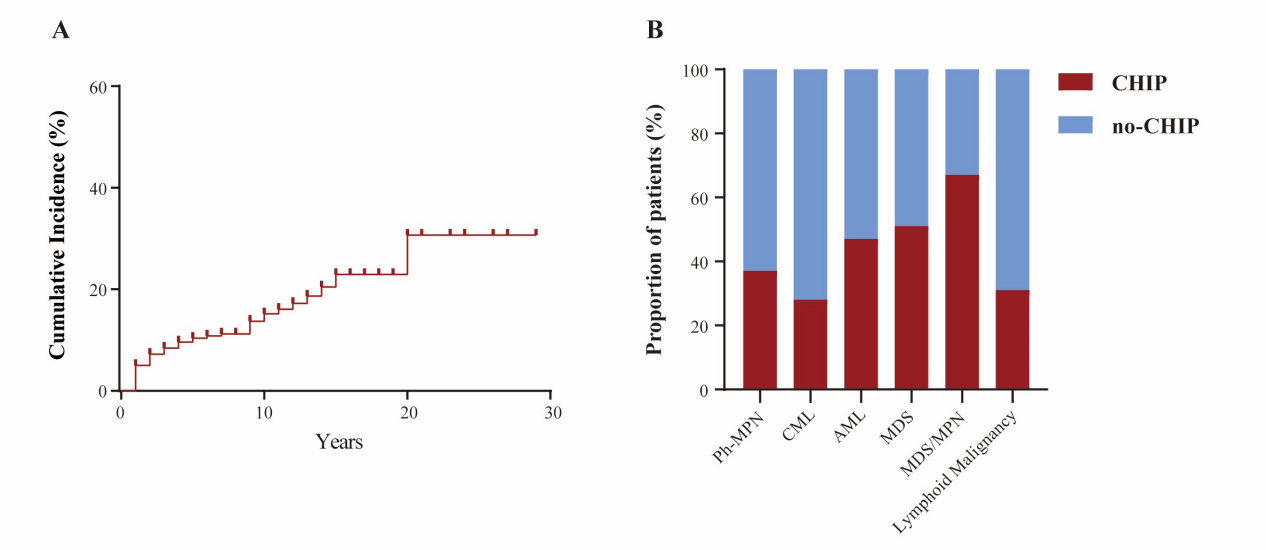


1. Incidence of AF in patients with hematologic malignancies. (B) Incidence of CHIP in different types of hematologic malignancies.

Figure S2. Spliceosome gene mutations are associated with AF risk in hematologic malignancies


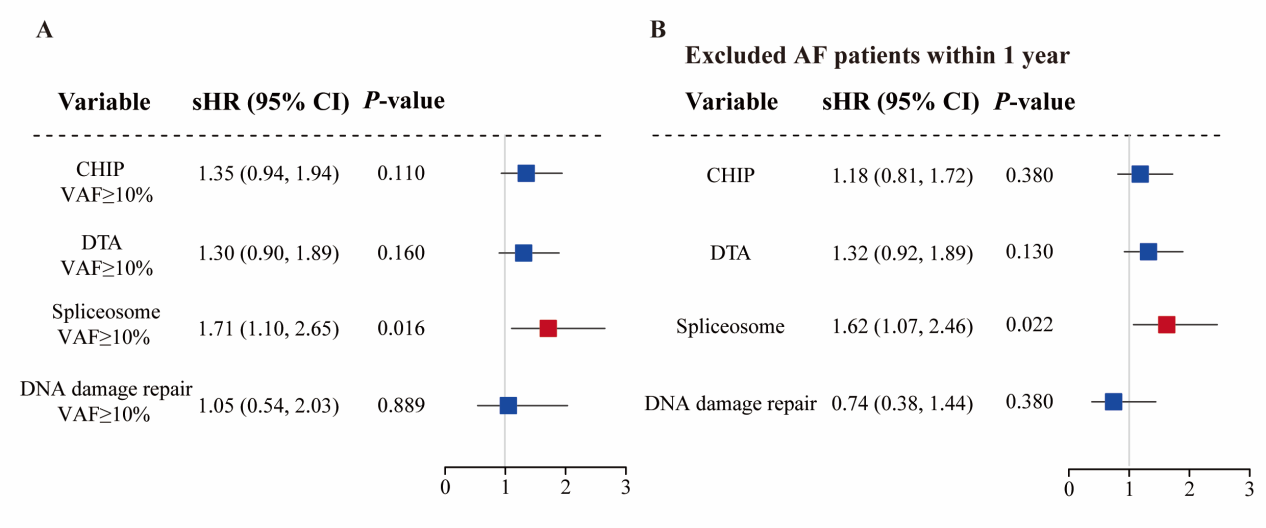
In patients with hematologic malignancies, (A) Association between CHIP-related gene mutation burden ≥ 10% and AF risk. (B) Association between CHIP-related gene mutations and AF risk, excluding AF patients within 1 year. Adjustments were made for gender, age, hypertension, smoking, diabetes, hyperlipidemia, and exposure to anthracycline drugs. HR, hazard ratio; AF, atrial fibrillation; CHIP, Clonal Hematopoiesis of Indeterminate Potential; DTA, *DNMT3A*, *TET2*, or *ASXL1* mutations.

Figure S3. Cardiac structural changes by spliceosome gene mutations and AF status in patients with hematologic malignancies


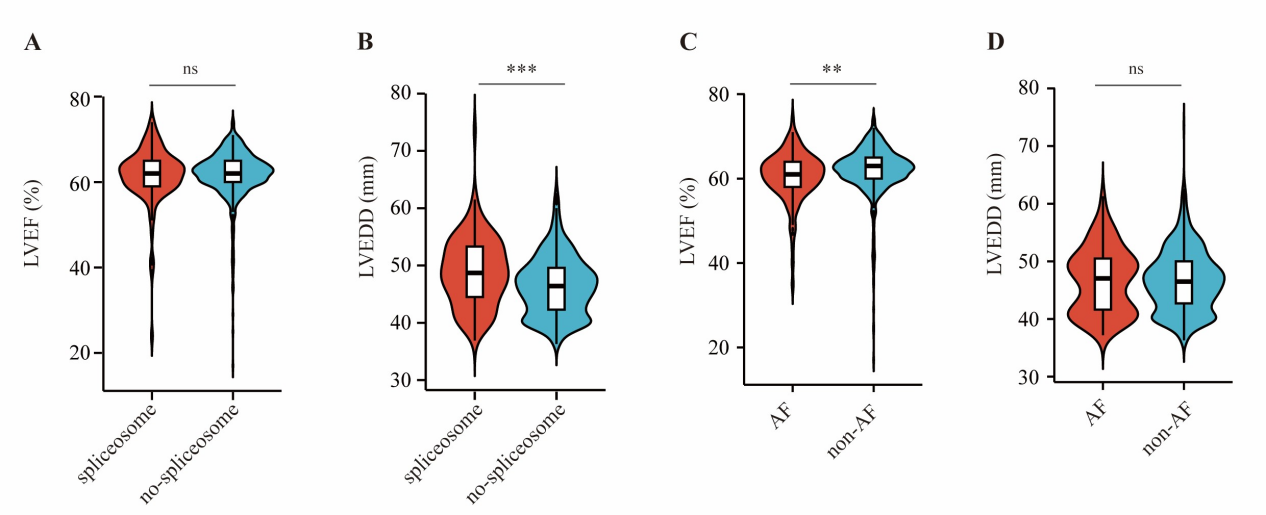
(A-B) Comparison of LVEF and LVEDD between patients with spliceosome gene mutations and those without. (C-D) Comparison of LVEF and LVEDD between the AF group and the non-AF group. LVEF, left ventricular ejection fraction; LVEDD, Left ventricular end-diastolic diameter; AF, atrial fibrillation. ** *P* < 0.01; *** *P* < 0.001.

Figure S4


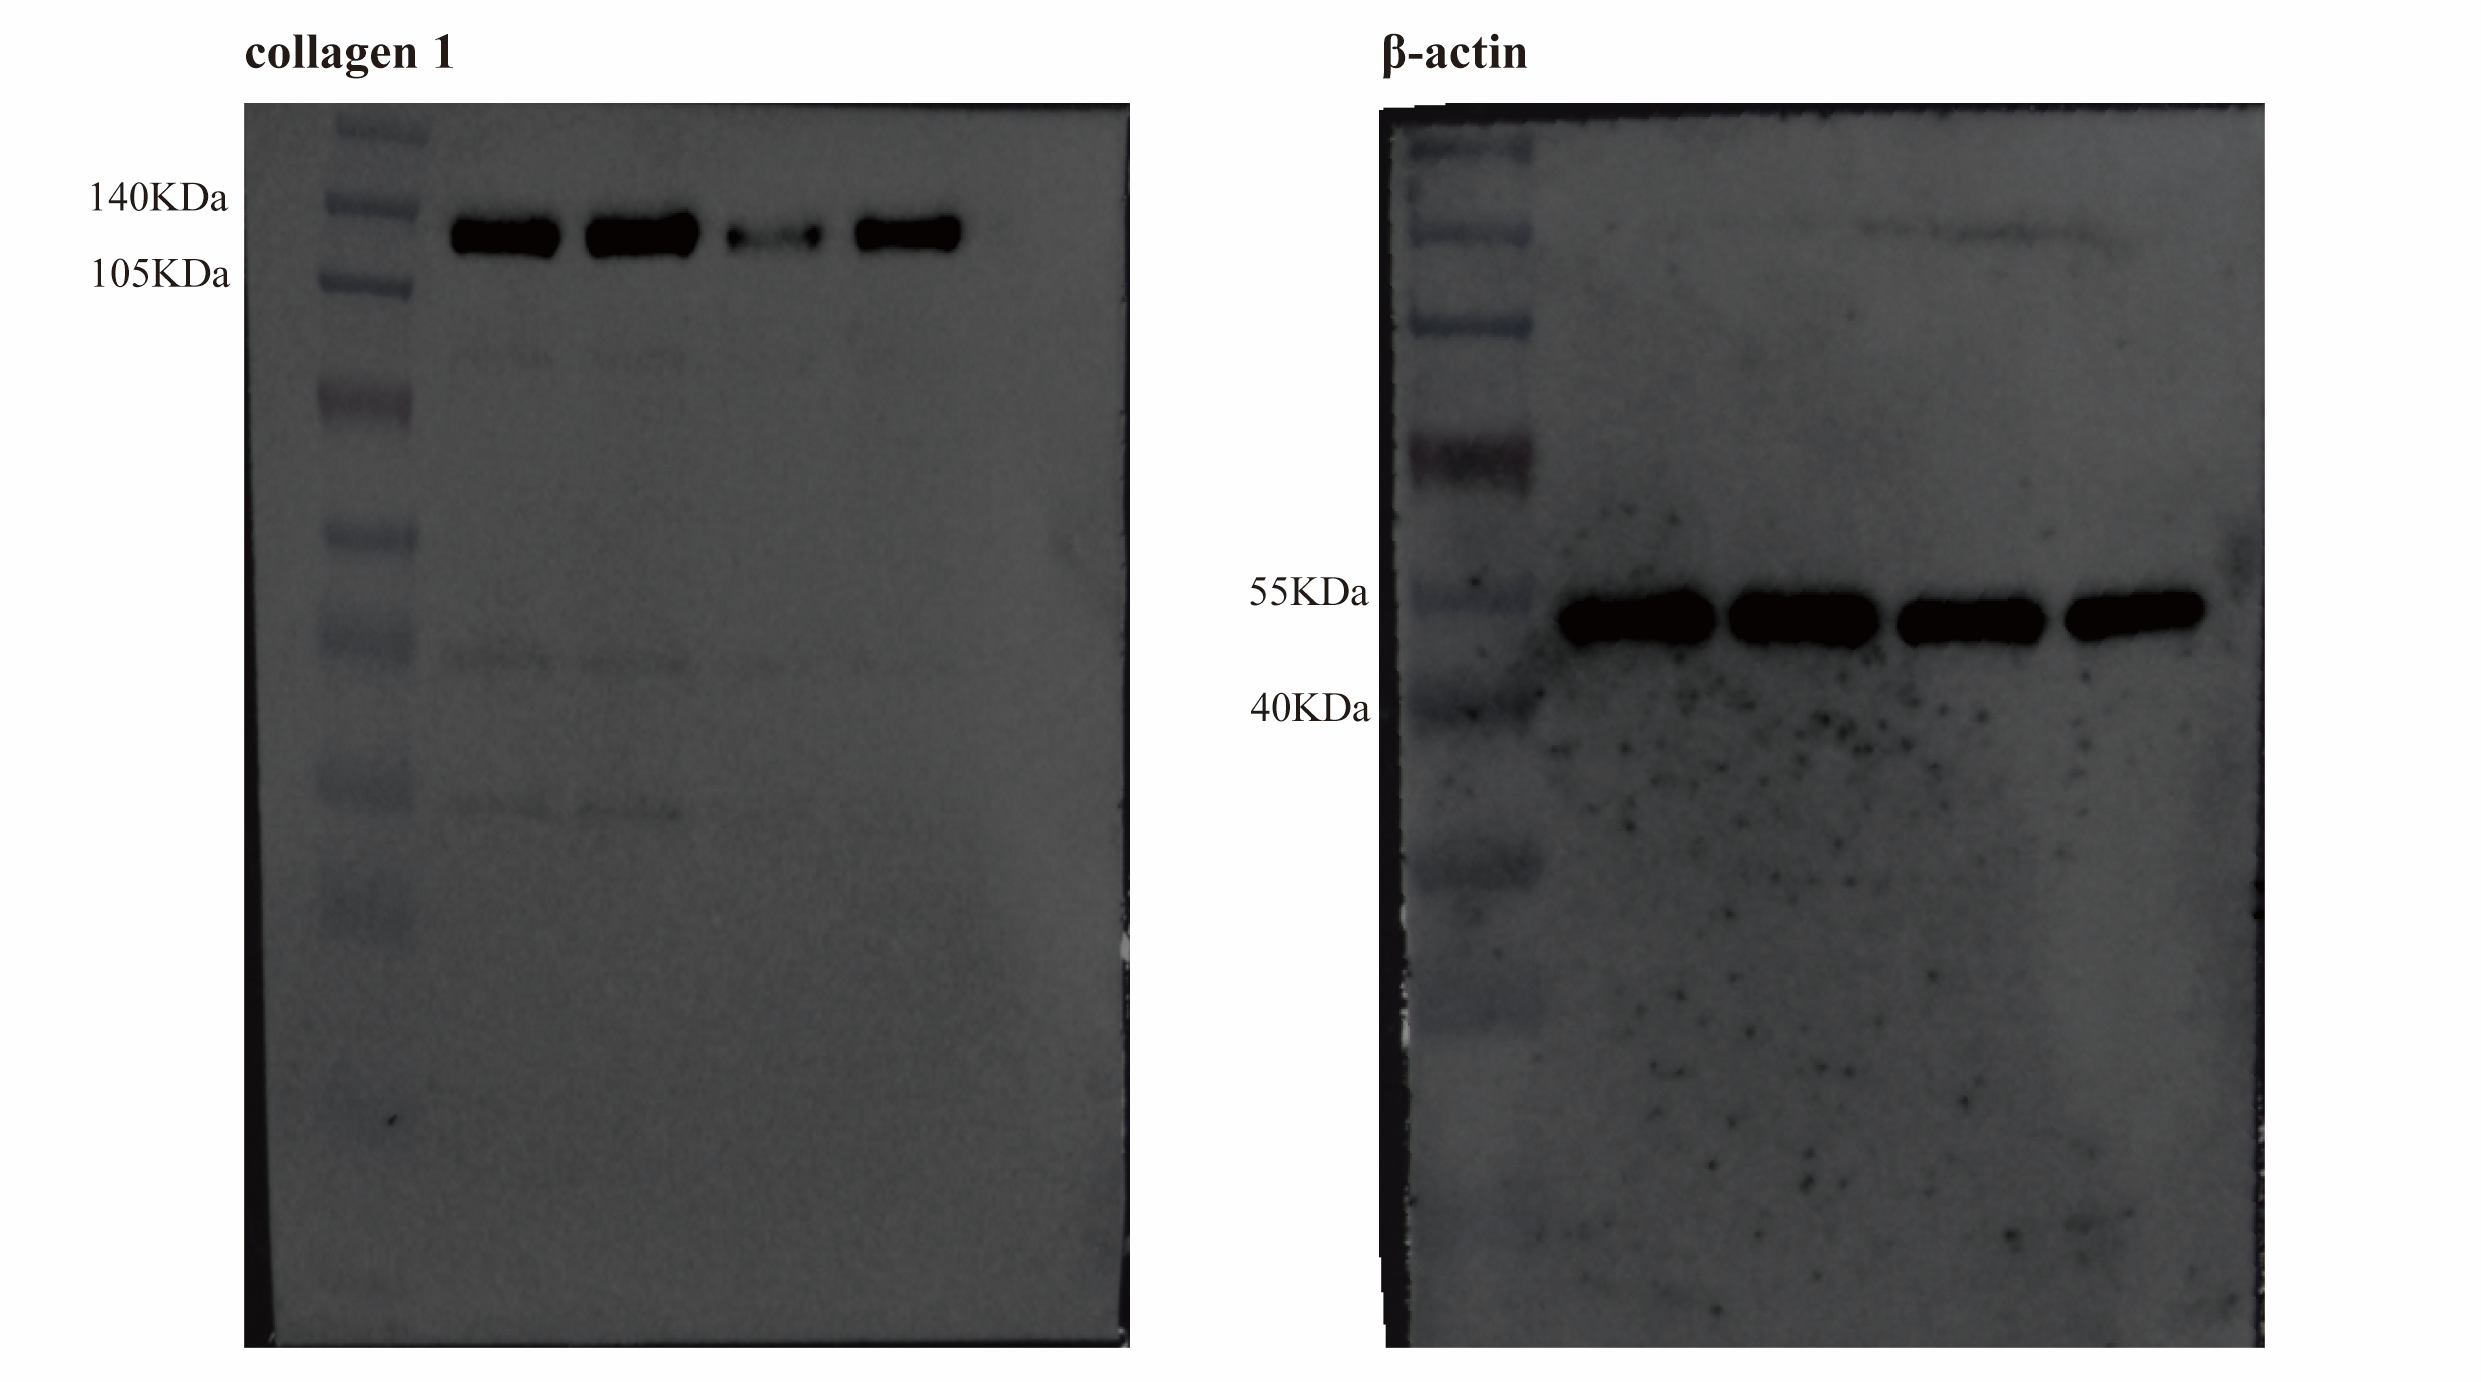

Supplement: Supplementary file 1 [file d14e2b279fcaade85e596c7d.docx]
